# Supplementary material for: Feeding Behavior of Subadult Sixgill Sharks (Hexanchus griseus) at a Bait Station
Source: PLoS One. 2016 May 31;11(5):e0156730. doi: 10.1371/journal.pone.0156730 (PMC4887027; doi:10.1371/journal.pone.0156730)
Supplement: S1 Data Set — Minimal data set associated with this article. (XLSX) [file pone.0156730.s001.xlsx]

## Sheet: Strike Composite
		in frames	1-Chumsicle, 4-Free	1-Chumsicle, 2-Partial, 3-Thawed, 4-Free	1-Ram, 2-Suck, 3-Bite, 4-Unknown, 5-Ram/Suck	1-Yes,2-No,3-Unknown	At least, u=unknown	1-Twist,2-Tear, 3-None, 4-Unknown,5-Both	1-Yes,2-No,3-Unknown	u-Unknown	1-Yes,2-No,3-Unknown,4-Spit
Shark ID	Strike #	StrikeDuration	Basic Bait type	Bait type	Capture Method	Prep bite	Number of Bites	Shearing technique	Tear, final	Shearing duration	Success	Head Length
8	1	876	1	1	1	1	10	3			2	58
8	2	386	4	4	1	2	1	3			1	58
8	3	232	1	1	1	2	4	1		16	2	58
8	4	605	1	1	1	1	7	1		152	2	58
8	5	409	1	1	1	1	4	3			2	58
8	6	805	1	1	1	1	10	2	1	177	1	58
8	7	865	1	1	1	1	11	1	1	350	1	58
9	1	407	4	4	4	3	1	3	2		1
9	2	333	1	2	5	3	3	3	1		1
9	3		4	4	2	3	4	3	2		1
9	4		4	4	3		3				1
11	1	490	4	4	5	3	4	3			1	67
11	2	867	1	2	1	1	8	1	3	550	3	67
11	3	145	4	4	4	3	1	3	3		1	67
11	4	1000	1	2	4	3	2	1	1	653	3	67
11	5	1000	1	2	1	2	13	1	3	210	3	67
11	6	140	4	4	2	3	3	3	1		1	67
11	7	1180	1	2	1	2	13	1	1	280	1	67
16	1	1624	1	2	1	1	18	1	3	295	3	70
16	2	273	4	4	4	3		4	3		1	70
16	3	269	1	2	4	3	2	3	1		1	70
16	4	1579	1	2	1	2	8	1	3		1	70
16	5	400	1	1	3	1	6	3	2		2	70
16	6		4	4	1	2	8				2	70
16	7	504	1	2	4	1	5	1	1	183	1	70
16	8	1134	1	2	4	1	11	1	1	450	1	70
16	9	727	1	2	4	1	11	2	1			70
21	1	704	1	2	4	3	8	2	1	150	1	63
21	2		1	2	0	3	5	1	2	179	3	63
21	3	888	1	2	1	1	10	3	2		3	63
27	1	600	1	3	4	3	8	3	2		1
27	2	1110	1	3	4	3	6	1	1	500	1
43	1		4	4	4	3		4	3		3
43	2	1286	1	2	4	3	8	5	1	257	1
43	3		4	4	1	1		4	3		3
63	1	927	1	3	3	1	7	3	2		2
84	1	358	1	3	1	3	6	3	2		2	40
56	1	126	4	4	2	2	3	3	2		1	55
56	2	289	4	4	1	3	2	3	2		1	55
57	1	527	1	1	1	1	7	1	2		1	60
57	2	834	1	1	1	1	16	3	2		3	60
57	3	136	1	1	1	1	3	3			1	60
57	4	262	4	4	4	3	4	3			1	60
58	1	986	4	4	1	3	13	1	1	30	1
58	2	163	1	1	1	1	3	2	2	41	1
95	1	63	1	1	2	2	1	3	2		1
95	2	700	1	1	1	1	10	1	1	242	2
95	3	30	4	4	4	3	1	3	2		1
95	4	107	4	4	4	1	1	3	2		1
95	5		4	4	4	3		3	2		1
95	6	509	1	2	1	1	5	1	2	200	1
95	7	470	1	2	1	1	8	3	2		1
97	1	225	4	4	3	1	5	1	1	10	1	40
97	2	88	1	2	1	2	2	2	2		2	40
97	3	188	4	4	4	3	3	3	2		1	40
97	4	470	1	2	1	1	9	1	1	160	1	40
100	1	1379	1	2	1	1	18	1	2	497	1
100	2	1104	1	2	1	1	12		1		1
100	3	269	1	2	4	3	3	2	1	60	1
100	4		1	2	4	3		4	3		1

## Sheet: Strike Bait Type
By Bait type			Chumsicle											Free Bait
		in frames	1-Ram, 2-Suck, 3-Bite, 4-Unknown, 5-Ram/Suck	1-Yes,2-No,3-Unknown	At least, u=unknown	1-Twist,2-Tear, 3-None, 4-Unknown,5-Both	1-Yes,2-No,3-Unknown	u-Unknown	1-Yes,2-No,3-Unknown,4-Spit						in frames	1-Ram, 2-Suck, 3-Bite, 4-Unknown, 5-Ram/Suck	1-Yes,2-No,3-Unknown	At least, u=unknown	1-Twist,2-Tear, 3-None, 4-Unknown,5-Both	1-Yes,2-No,3-Unknown	u-Unknown	1-Yes,2-No,3-Unknown,4-Spit
Shark ID	Strike #	StrikeDuration	Capture Method	Prep bite	Number of Bites	Shearing technique	Tear, final	Shearing duration	Success	Head Length			Shark ID	Strike #	StrikeDuration	Capture Method	Prep bite	Number of Bites	Shearing technique	Tear, final	Shearing duration	Success	Head Length
8	1	876	1	1	10	3			2	58
8	3	232	1	2	4	1		16	2	58			8	2	386	1	2	1	3			1	58
8	4	605	1	1	7	1		152	2	58			9	1	407	4	3	1	3	2		1
8	5	409	1	1	4	3			2	58			9	3		2	3	4	3	2		1
8	6	805	1	1	10	2	1	177	1	58			9	4		3		3				1
8	7	865	1	1	11	1	1	350	1	58			11	1	490	5	3	4	3			1	67
9	2	333	5	3	3	3	1		1				11	3	145	4	3	1	3	3		1	67
11	2	867	1	1	8	1	3	550	3	67			11	6	140	2	3	3	3	1		1	67
11	4	1000	4	3	2	1	1	653	3	67			16	2	273	4	3		4	3		1	70
11	5	1000	1	2	13	1	3	210	3	67			16	6		1	2	8				2	70
11	7	1180	1	2	13	1	1	280	1	67			43	1		4	3		4	3		3
16	1	1624	1	1	18	1	3	295	3	70			43	3		1	1		4	3		3
16	3	269	4	3	2	3	1		1	70			56	1	126	2	2	3	3	2		1	55
16	4	1579	1	2	8	1	3		1	70			56	2	289	1	3	2	3	2		1	55
16	5	400	3	1	6	3	2		2	70			57	4	262	4	3	4	3			1	60
16	7	504	4	1	5	1	1	183	1	70			58	1	986	1	3	13	1	1	30	1
16	8	1134	4	1	11	1	1	450	1	70			95	3	30	4	3	1	3	2		1
16	9	727	4	1	11	2	1			70			95	4	107	4	1	1	3	2		1
21	1	704	4	3	8	2	1	150	1	63			95	5		4	3		3	2		1
21	2		4	3	5	1	2	179	3	63			97	1	225	3	1	5	1	1	10	1	40
21	3	888	1	1	10	3	2		3	63			97	3	188	4	3	3	3	2		1	40
27	1	600	4	3	8	3	2		1
27	2	1110	4	3	6	1	1	500	1
43	2	1286	4	3	8	5	1	257	1
63	1	927	3	1	7	3	2		2
84	1	358	1	3	6	3	2		2	40
57	1	527	1	1	7	1	2		1	60
57	2	834	1	1	16	3	2		3	60
57	3	136	1	1	3	3			1	60
58	2	163	1	1	3	2	2	41	1
95	1	63	2	2	1	3	2		1
95	2	700	1	1	10	1	1	242	2
95	6	509	1	1	5	1	2	200	1
95	7	470	1	1	8	3	2		1
97	2	88	1	2	2	2	2		2	40
97	4	470	1	1	9	1	1	160	1	40
100	1	1379	1	1	18	1	2	497	1
100	2	1104	1	1	12		1		1
100	3	269	4	3	3	2	1	60	1
100	4		4	3		4	3		1

## Sheet: Bite Composite
	8(58cm)m			11(66cm)f		16(70cm)f	56(55cm)f		57(60cm)f	97(~40cm)m
Mandible Max	6	5	5	10	7	10	7	6	7	3
Man. Max Duration	8	5	6	11	9	12	9	7	8	5
Mandible Elevation	12	10	18	19	11	25	14	11	14	12
Max Gape	6	5	5		7	11	7	6	7	4
Cranial Onset	0	0	0	0	0	0	0	0	0	0
Cranial Max	3	2	5		6	7		6	7	3
Cranial Max Duration	11	6	7		10	20	8	9	9	6
Cranial Depression	14	10			15	28	15	17	14	15
Labial Onset	2	3	0		4	6		2	4	2
Labial Extension	5	4	5		7	12		6	7	3
Labial Max Duration	8	8	6		10	16		17	9	7
Labial Retraction	12	10	10		14	28		19	14	11
Food in mouth	3		6						4
Food Seized	9	7	8		11	15		14	12	8
Gill Cave	2	2	3		3			4	3	1
Gill Collapse	7	7	5		7	3		6	7	3
Gill Collapse duration	8	8	6		8	5		7	8	4
Gill Expand	11	10	9		14	18		18	17	8
Gill Normal	22	16	12		25	28		27	20	17
PQ protrusion				9	5	6	7
PQ Max				13	13	15	8
PQ Max Duration				19	14
PQ Retraction				28			16			19
Total Time	14	10	18	19	14	28	15	17	14	15
Head Length	58	58	58	66	66	70	55	55	60	40
Max Gape measure	21	23	18	28			18	19	24		37% HL	range 31-42%
Max Gape angle	49	69	45	64				66		55	50 degrees
